1 Method to identify unfavorable regions

2

3 **A heuristic method to identify runs of homozygosity associated with reduced**  
4 **performance in livestock**

5

6 J. T. Howard\*, F. Tiezzi\*, Y. Huang†, K. A. Gray†, C. Maltecca\*‡

7

8 \*Department of Animal Science, North Carolina State University, Raleigh, NC 27695-  
9 7627, USA.

10 †Smithfield Premium Genetics, Rose Hill, NC 28458, USA

11 ‡Genetics Program, North Carolina State University, Raleigh, NC 27695-7627, USA.

12

13

14

15

16

17 Corresponding Author: Jeremy Howard

18 Address: Department of Animal Science

19 North Carolina State University,

20 Raleigh, NC 27695-7627

21 Phone: (919) 515-0811

22 E-mail: [jthoward@ncsu.edu](mailto:jthoward@ncsu.edu)

23

24

## ABSTRACT

25

26

27

28

29

30

31

32

33

34

35

36

37

38

39

40

41

42

43

44

45

46

While for the most part genome-wide metrics are currently employed in managing livestock inbreeding, genomic data offer, in principle, the ability to identify functional inbreeding. Here we present a heuristic method to identify haplotypes contained within a run of homozygosity (ROH) associated with reduced performance. Results are presented for simulated and swine data. The algorithm comprises 3 steps. Step 1 scans the genome based on marker windows of decreasing size and identifies ROH genotypes associated with an unfavorable phenotype. Within this stage, multiple aggregation steps reduce the haplotype to the smallest possible length. In step 2, the resulting regions are formally tested for significance with the use of a linear mixed model. Lastly, step 3 removes nested windows. The effect of the unfavorable haplotypes identified and their associated haplotype probabilities for a progeny of a given mating pair or an individual can be used to generate an inbreeding load matrix (**ILM**). Diagonals of **ILM** characterize the functional inbreeding load of individual (**IIL**). We estimated the accuracy of predicting the phenotype based on **IIL**. We further compared the significance of the regression coefficient for **IIL** on phenotypes to genome-wide inbreeding metrics. We tested the algorithm using simulated scenarios ( $n = 12$ ) combining different levels of linkage disequilibrium (**LD**) and number of loci impacting a quantitative trait. Additionally, we investigated 9 traits from two maternal purebred swine lines. In simulated data, as the **LD** in the population increased the algorithm identified a greater proportion of the true unfavorable ROH effects. For example, the proportion of highly unfavorable true ROH effects identified raised from 32 to 41 % for the low to the high **LD** scenario. In both simulated and real data the haplotypes identified were contained within a much larger

47 ROH (9.12-12.1 Mb). The IIL prediction accuracy was greater than zero across all  
48 scenarios for simulated data (high LD scenario mean (95% confidence interval): 0.49  
49 (0.47-0.52)) and for nearly all swine traits (mean  $\pm$  SD: 0.17 $\pm$ 0.10). On average across  
50 simulated and swine datasets the IIL regression coefficient was more closely related to  
51 progeny performance than any genome-wide inbreeding metric. A heuristic method was  
52 developed that identified ROH genotypes with reduced performance and characterized  
53 the combined effects of ROH genotypes within and across individuals.

54 Key Words: inbreeding, runs-of-homozygosity, swine.

## 55 **INTRODUCTION**

56 The implementation of routine genotyping within livestock breeding populations  
57 has become a common practice and is used as a tool to make more effective selection  
58 decisions in swine breeding companies (Knol et al., 2016). Previous research has  
59 highlighted the advantages of genomic relationships compared to pedigree-based  
60 information to obtain more precise estimates of the genetic merit and homozygosity of an  
61 individual (Knol et al., 2016; Lopes et al., 2013). Also, genomic information allows  
62 genome-wide inbreeding estimates to be supplemented by characterizing the impact of  
63 homozygosity for specific genomic regions. Elevated levels of homozygosity result in a  
64 reduction in phenotypic performance, referred to as inbreeding depression (Falconer and  
65 Mackay, 1996). The identification of region-specific stretches allows breeders to manage  
66 inbreeding more effectively since the impact of homozygosity for a trait can vary across  
67 the genome. The estimation of dominance effects to identify unfavorable regions of the  
68 genome have been utilized in the past (Lopes et al., 2016; Xiang et al., 2016), but lacks  
69 power for low frequency mutations and doesn't consider that whole segments of the

70 genome are passed from parent to offspring. To overcome these limitations, regions of  
71 the genome in a continuous run of homozygosity (ROH) have been proposed to  
72 investigate homozygous segments that arose due to past inbreeding (Howard et al., 2015;  
73 Saura et al., 2015). Previous research has investigated the phenotypic effect of a region  
74 being in an ROH (Pryce et al., 2014; Howard et al., 2015). The previous methods did not  
75 directly identify the unique ROH genotype that gave rise to the reduced phenotypic  
76 performance. Within this paper, we have attempted to close this gap by developing a  
77 heuristic algorithm to identify unfavorable haplotypes contained within ROH across the  
78 genome. The method was tested on simulated as well as real data.

## 79 MATERIALS AND METHODS

80 No animal care approval was required for this work since all genotypes and  
81 records came from data that were available from previous studies. The manuscript will be  
82 split in two sections. In the first section, we will provide an overview of the algorithm  
83 along with methods to summarize the number of unfavorable haplotypes shared within  
84 and across individuals. In the second part of the paper we will employ simulated and  
85 swine data sets to summarize three major results: (1) how effective the algorithm is at  
86 identifying unfavorable haplotypes, (2) the length of ROH the unfavorable haplotype  
87 tags, (3) the relationship of the aggregate effect of unfavorable haplotypes carried by an  
88 individual with its phenotype and genetic value.

### 89 *Description of the algorithm*

90 A pictorial overview of the algorithm is displayed in **Figure 1**. The method  
91 follows three steps. The first step scans the genome to identify ROH genotypes that result  
92 in an unfavorable change in the phenotype of interest. The genotypes utilized in the

93 algorithm are coded as 0 for the homozygote, 2 for the alternative homozygote and 1 for  
94 the heterozygote. Step 1 begins at the first SNP of a chromosome by constructing a  
95 window of a predetermined number of SNP (default = 60). Within a window, the mean  
96 phenotype is tabulated for each unique ROH genotype and any genotype that is not in a  
97 ROH is aggregated into a category referred to as nonROH. Furthermore, any ROH  
98 genotype below a user defined frequency (default = 0.0075) is removed from the ROH  
99 genotype list and placed in the nonROH category. If the phenotypic mean for a ROH  
100 genotype is below/above a user defined value (discussed below), the window is stored.  
101 Next, the window is shifted forward by one SNP and the previous process is repeated.  
102 Once the entire chromosome has been scanned, windows containing the same set of  
103 animals and representing the same ROH genotype except for the first and last SNP are  
104 aggregated (i.e. **Figure 1**: Step 1b). Since recombination does not occur within a given  
105 region for the individuals of the same ROH genotype, ROH genotypes that are combined  
106 in this step contain the same amount of information. Following the aggregation of nested  
107 windows, the window length is reduced by “n” SNP (default = 5) and the previous steps  
108 are repeated for the new window size. The window size is reduced by “n” until a  
109 minimum window size is reached (default = 20). Once the minimum window size is  
110 reached, the process of scanning for unfavorable ROH genotypes is complete for a  
111 chromosome. For windows that contain the same set of animals and are nested within  
112 each other (i.e. **Figure 1**: Step 1d), the shortest window is kept for further analysis. The  
113 aggregation steps (i.e. Step 1b and 1d) trap the ROH genotypes across individuals that  
114 have the same core ROH genotype of the smallest possible length. No information is lost  
115 within the aggregation steps as each ROH genotype belongs to the same set of

116 individuals, yet the step significantly reduces the number of windows tested in following  
117 steps. The core ROH genotype is now expected to serve as a tag for the full ROH  
118 segment observed in an individual, which may differ across subjects due to  
119 recombination occurring at different locations across subjects.

120 Any window remaining after Step 1 is subsequently tested for significance using a  
121 standard mixed model that accounts for the environment, additive genetic and permanent  
122 environment effect of an individual, plus any number of fixed effects. A description of  
123 the full model for each window is outlined below:

$$y = \mathbf{X}b + \mathbf{Z}a + \mathbf{W}pe + e,$$

124 where  $y$  is the trait of interest,  $b$  is a vector of fixed effects,  $a$  is a vector of random  
125 additive genetic effects,  $pe$  is a vector of random permanent environmental effects,  $e$  is a  
126 vector of random residuals and  $\mathbf{X}$ ,  $\mathbf{Z}$ , and  $\mathbf{W}$  are incidence matrices relating  $b$ ,  $a$  and  $pe$   
127 with  $y$ , respectively. The fixed effects can include any environmental classification or  
128 covariate effect along with the effect of ROH genotype (i.e. unique ROH genotype and  
129 nonROH) for a given window. The random additive genetic effect is assumed  $\sim N(0,$   
130  $\mathbf{A}\sigma_a^2)$ , with  $\mathbf{A}$  representing the additive relationship matrix derived from a pedigree  
131 (Henderson, 1976). The random permanent environmental and residual effects are  
132 assumed  $\sim N(0, \mathbf{I}\sigma_{pe}^2)$  and  $\sim N(0, \mathbf{I}\sigma_e^2)$ , respectively, with  $\mathbf{I}$  being an identity matrix.  
133 Variance components of the current implementation are assumed fixed across windows  
134 based on the null model of no ROH effect (i.e. no ROH genotype in the model). For each  
135 window, solutions are obtained via the Cholesky decomposition of the left-hand side  
136 (**LHS**). Given the solutions for each window, a contrast between each unique ROH  
137 genotype versus nonROH and the associated t-statistic are obtained. The contrasts ( $\mathbf{L}\hat{\beta}$ )

138 are obtained following Welham et al. (2004) and Gilmour et al. (2004). The t-statistic is  
139 generated based on the following formula:

$$140 \quad t_{(\mathbf{L}\hat{\beta})} = \frac{\mathbf{L}\hat{\beta} - 0}{\sigma_{\mathbf{L}\hat{\beta}}},$$

141 where  $\mathbf{L}\hat{\beta}$  refers to the estimated contrast and  $\sigma_{\mathbf{L}\hat{\beta}}$  refers to the standard error of the  
142 contrast, calculated as  $\mathbf{L}(\mathbf{LHS}^{-1})\mathbf{L}'$ . The hypothesis test is one-sided and the direction of  
143 the test is dependent on the direction of the unfavorable phenotype. Under this  
144 parameterization, the genotypes not in an ROH are assumed normal compared to  
145 individuals that have the ROH genotype. This aligns with the partial dominance  
146 hypothesis, which is thought to account for the majority of inbreeding depression  
147 observed in populations (Simmons and Crow, 1977; Charlesworth and Charlesworth,  
148 1987). Any contrast that passes the user-defined significance threshold is kept and moved  
149 onto the final window reduction step which resolves nested windows (i.e. **Figure 1**: Step  
150 3).

151 The algorithm presented was developed in C++11. The source code and compiled  
152 executable files for Linux operating systems are available at  
153 “<https://github.com/jeremyhoward>”. The primary option the user controls is the cutoff  
154 value for the mean phenotype for a given ROH genotype that is considered unfavorable  
155 in Step1a. The user can specify a cutoff value based on prior knowledge of what is  
156 considered an unfavorable phenotype or generate an empirical t-statistic distribution from  
157 the data to declare a cutoff value. The latter option is conducted by randomly specifying a  
158 chromosome, window length and start position and estimating the significance value for  
159 ROH genotypes within the window. All one-sided t-statistics are stored. Across samples,

160 the mean phenotype for t-statistics with a significance ranging from 0.10 and 0.05 is  
161 chosen as the cutoff value.

162 The haplotypes identified can be utilized in a variety of ways, but two are  
163 investigated in the current study. The first application is to apply the algorithm across  
164 economically important phenotypes and identify haplotypes having an unfavorable effect  
165 across multiple traits. Regions with consistent unfavorable effect across multiple traits  
166 should have a high probability of being sensitive to inbreeding and thus result in a  
167 reduction in the overall fitness and vigor of an individual. The second application is to  
168 generate a matrix aiming at characterizing the decrease in the trait of interest across all  
169 unfavorable haplotypes, herein referred to as the inbreeding load matrix (**ILM**). Its  
170 calculation follows the method outlined by Cole (2015). In order to implement an **ILM**,  
171 the genotype phase needs to be known. This matrix then can be utilized in mating designs  
172 to minimize the probability of progeny containing the unfavorable haplotype(s) for a  
173 single trait or across multiple traits. The diagonals of the matrix, referred to as individual  
174 inbreeding load (**IIL**), represent an individual's decrease in the phenotypic  
175 performance(s) due to inbreeding, while off-diagonals represent the decrease in the  
176 trait(s) of the progeny given the mating of the two (potential) parents. It should be noted  
177 that in this implementation the algorithm does not run all haplotypes across the genome  
178 simultaneously. As a result, any observed ROH genotype for an individual might contain  
179 multiple significant unfavorable haplotypes. Therefore multiple tag haplotypes identified  
180 by the algorithm could be counted as different in an individual, when in fact they are  
181 tagging the same observed haplotype. Within the current study, when multiple haplotypes  
182 tagged the same observed ROH genotype, only the haplotype with the highest



183 significance value and resulting in the largest number of haplotypes observed across  
184 individuals was retained. For the  $i^{\text{th}}$  row and  $j^{\text{th}}$  column of **ILM**, the following formula  
185 was utilized to calculate the value:

$$186 \quad ILM_{ij} = \sum_{h=1}^{h=n} (ROH)_h * \hat{\beta}_h,$$

187 where  $n$  is the number of unfavorable haplotypes that remained after eliminating  
188 haplotypes that were not observed or removed to avoid double counting. The  $ROH_h$   
189 refers to the probability of generating a ROH for haplotype <sub>$h$</sub>  and  $\beta_h$  is the effect of the  
190 ROH genotype estimated from Step 2 of the algorithm. The probability values for the  
191 diagonal elements of the ILM include 0.25 (haplotype carrier) or 1.0 (haplotype in  
192 ROH). The probability values for the off-diagonal elements include 0.25 (mating of  
193 haplotype carriers), 0.5 (mating of haplotype carrier and ROH genotype) or 1.0 (both  
194 parents have ROH genotype). The **ILM** values range from 0 (i.e. no unfavorable  
195 haplotypes) to any value in the unfavorable direction.

#### 196 *Summary of metrics utilized to test the algorithm using simulated and swine data*

197 Simulated datasets, where the true genetic signal is known, were employed to  
198 determine how effective the algorithm was at identifying true negative ROH regions as  
199 well as to characterize the relationship between IIL and the true aggregate genotypic  
200 value of individuals. The length of ROH the unfavorable haplotype tagged was  
201 determined across both simulated and swine datasets in order to ensure that long stretches  
202 of ROH were represented. Long ROH stretches have a higher probability of being true  
203 IBD segments as a result of recent inbreeding, compared to shorter ones. The  
204 relationship between IIL and the phenotype was summarized based either on a) IIL  
205 accuracy of predicting the phenotype or b) the significance of the regression coefficient

206 when IIL was included as a fixed covariate in a mixed linear model. The latter  
207 relationship was generated under the premise that the management of inbreeding is  
208 traditionally done by minimizing parental coancestries using genome-wide inbreeding  
209 metrics. Therefore, the significance (i.e.  $-\log p\text{-value}$ ) of the regression coefficient from  
210 traditionally utilized genome-wide inbreeding metrics was compared with the IIL value.  
211 Lastly, IIL was benchmarked across simulated and swine datasets with estimates of the  
212 genetic value based on a whole genome regression model. This was conducted to  
213 generate a reference comparison on the prediction accuracy for a given trait based on  
214 traditionally utilized genome-wide modeling techniques. It is important to note that the  
215 genetic signal from IIL encompasses only unfavorable effects resulting from long IBD  
216 segments. As a result, a comparison of the prediction accuracies between the two metrics  
217 needs not to be interpreted as an exercise of ranking the predictive ability of the two  
218 metrics, (IIL value would by construction only capture a subset of the overall genetic  
219 signal) but rather to determine the relationship between complementary metrics, in order  
220 to allow their integration.

### 221 *Simulated Data*

222 Multiple scenarios were simulated to determine the frequency of unfavorable  
223 haplotypes being identified by the algorithm. Simulation was carried out using Geno-  
224 Diver (Howard et al. In Press), a combined coalescence and forward in time simulation  
225 software. We hypothesized that the amount of short-range LD existing in the genome  
226 impacts how well the algorithm can identify unfavorable haplotypes. Four scenarios of  
227 increasing levels of short-range LD in the historical population were generated as  
228 outlined in **Figure S1** and will be referred to as the *low*, *low-medium*, *medium-high* and

229 *high*, respectively. For each LD scenario, different genetic architectures were simulated  
230 with 250, 500 or 1000 QTL spread equally across 5 chromosomes. The combination of  
231 variable LD and QTL parameters produced 12 different scenarios. Each scenario was  
232 replicated 25 times.

233         Within each LD setting, SNP sequence data for 4000 base haplotypes across 5  
234 chromosomes, each with a length of 150 Megabases, were simulated by internally calling  
235 MaCS (Chen et al., 2009) within the Geno-Diver software. Scenarios with the same LD  
236 parameter were initialized using the same set of sequence data to limit the computational  
237 time and variability across replicates due to historical sequence information. Following  
238 the generation of sequence data, QTL were randomly placed along the genome and a  
239 SNP panel with neutral markers was created. A total of 4,000 markers (20,000 genome-  
240 wide) were utilized within each chromosome. This marker density was chosen to  
241 generate a density within each chromosome that is similar to a medium density marker  
242 array such as the Illumina PorcineSNP60K (Illumina Inc., San Diego, CA). Across all  
243 scenarios, the minimum minor allele frequency was set at 0.10 and 0.015 for markers and  
244 QTL, respectively.

245         For each QTL the additive effect ( $a$ ) of a QTL, defined as half the difference in  
246 genotypic value between the homozygote genotypes (Falconer and Mackay, 1996), was  
247 sampled from a gamma distribution (shape = 0.4; scale = 1.66) with an equal chance of  
248 being positive or negative. The dominance effect ( $d$ ) of a QTL, defined as the deviation  
249 of the genotypic value of the heterozygote from the mean of the genotypic values of the  
250 two homozygotes (Falconer and Mackay, 1996), was generated similarly to Wellmann &  
251 Bennewitz (2012). First, the degree of dominance ( $h$ ) at QTL<sub>*i*</sub> was sampled from a

252 normal distribution (mean = 0.1; variance = 0.04) and then the dominance effect at QTL<sub>i</sub>  
253 was calculated as  $d_i = h_i|a_i|$ , where  $|a_i|$  is the absolute value of the additive effect. Across  
254 all scenarios, the additive and dominance effects were scaled to generate a narrow and  
255 broad sense heritability ( $H^2$ ) of 0.35 and 0.40, respectively. The normal distribution  
256 parameters used to generate the degree of dominance were utilized to create a trait that  
257 displayed directional dominance along with a majority of the loci displaying partial  
258 dominance. Phenotypes were simulated by adding a residual value, generated from a  
259 normal distribution (mean = 0, variance =  $(1 - H^2)$ ), to the genotypic value for each  
260 animal. Summary statistics on the QTL architecture and genetic diversity of the 12  
261 scenarios is outlined in **Table S1**.

262         After the founder population and genetic architecture of the trait was generated a  
263 selection scenario mimicking a livestock population was undertaken for ten generations.  
264 A population consisting of 50 males and 600 females was utilized, with a replacement  
265 rate of 20% for both males and females. Progeny with a high estimated breeding value  
266 (EBV) were selected to serve as parents for the next generation and EBV were generated  
267 from an animal model based on pedigree information. A low phenotypic value  
268 represented the unfavorable direction for the simulated trait in this case. Animals were  
269 mated at random and one progeny was produced for each mating pair. Progeny born from  
270 generation 7 to 9 served as the training population to identify unfavorable haplotypes and  
271 progeny from generation 10 served as the validation population. The model utilized to  
272 identify unfavorable haplotypes in the simulation data set did not have a permanent  
273 environmental effect since individuals only had 1 observation and the only fixed effect  
274 was the overall mean. The starting window size was set at 60 and was reduced by 5 until

275 a window size of 20 SNP was reached. Different SNP window sizes were investigated  
276 based on the density simulated. Similar results were found in terms of the regions  
277 identified, associated effects and its relationship with the phenotype (data not shown).  
278 The suggestive phenotypic cutoff in step 1 was declared by randomly sampling 1000  
279 windows to generate the empirical t-statistic distribution.

280 To investigate the proportion of true negative ROH effects the algorithm captured  
281 within each replicate, the true effect for any ROH with a length greater than 1 Mb was  
282 calculated. A length of 1 Mb was chosen to provide a range of possible ROH lengths  
283 captured by the algorithm. The true negative and positive ROH effects were split into  
284 quantiles of decreasing and increasing effects, respectively. The algorithm only tests for  
285 the unfavorable direction and therefore the percentage of true ROH effects the algorithm  
286 identified is expected to be higher in the negative compared to the positive direction.  
287 Lastly, using the same 1 Mb ROH cutoff, statistics on the length of ROH the algorithm  
288 identified (or missed) were calculated.

289 Within each replicate, the ILL was estimated based on haplotypes identified in the  
290 training population for individuals in the validation population. The correlation between  
291 ILL and the true genotypic value (TGV), true breeding value (TBV) and true dominance  
292 deviation (TDD) was also estimated. Additionally, the significance (i.e.  $-\log p\text{-value}$ ) of  
293 ILL or a genome-wide metric when included as a fixed covariate effect was estimated for  
294 the validation population. The ILL or genome-wide metric was included as a fixed  
295 covariate in the similar model (i.e. no ROH effect included in model) that was used to  
296 identify haplotypes in the training population. Three genome-wide inbreeding metrics  
297 were used as comparison including pedigree inbreeding (Henderson, 1976), diagonals of

298 the SNP-by-SNP relationship matrix (**SNPRM**; VanRaden, 2008) or proportion of the  
299 markers that were homozygous.

300 To explore the predictive ability of IIL compared to estimates of the genetic value  
301 utilizing whole genome regression models, a Bayesian Ridge Regression (BRR) analysis  
302 was conducted that included the additive and dominance effect for each SNP. The same  
303 training and validation generations that were utilized previously were also used in the  
304 BRR analysis. Marker effects were estimated using the ‘BGLR’ package in R (Perez and  
305 de los Campos, 2014). A total of 55,000 iterations were run with the first 5,000 discarded  
306 as burn-in and a thinning rate of 5. Across individuals, the estimated breeding value  
307 (EBV), dominance deviation (EDD) and genotypic value (EGV) were generated by  
308 multiplying the estimated effect by the associated genotype and summing across all  
309 markers. The prediction accuracy for either IIL or EGV was determined in the validation  
310 population based on the correlation between phenotype and EGV or IIL, respectively. It  
311 was standardized by dividing by the square root of the heritability estimated in the  
312 training generation for each replicate (Legarra et al., 2008; Wolc et al., 2011).  
313 Correlations between IIL and the EBV, EDD or EGV were also estimated.

#### 314 *Swine Data*

315 Phenotypic and genotypic data from two maternal purebred nucleus selection lines  
316 were obtained from Smithfield Premium Genetics (Rose Hill, NC). In order to determine  
317 the algorithm’s behavior across different genetic architectures, multiple traits were  
318 investigated including litter size, litter viability and growth rate. Individuals with  
319 genotype information from Large White (LW, n = 6,750) and Landrace (LR, n = 5,010)  
320 were utilized. Animals born before 2012 were used as a training population and animals

321 born on 2013 were used as a validation population and the number of animals across  
322 traits is outlined in **Table 1**. A complete description of the genotype quality control is  
323 outlined in Howard et al. (2016). Briefly, genotype data was derived from the Illumina  
324 PorcineSNP60K BeadChip (Illumina Inc., San Diego, CA) and the GGP-Porcine  
325 (GeneSeek Inc., a Neogen Co., Lincoln, NE). Multiple quality control measures were  
326 conducted before imputing and phasing missing and low-density to medium-density  
327 genotypes using Beagle (Version 3; Browning & Browning 2007). After quality control  
328 and discarding SNP that were poorly imputed, a total of 39,671 and 41,489 autosomal  
329 SNP for LW and LR remained, respectively.

330       Seven litter size and mortality traits including number born alive (NBA), total  
331 number born (TNB), proportion born dead (PD), average litter birth weight (LBW),  
332 preweaning mortality (PWM), number weaned (NW) and average litter wean weight  
333 (NWBW) were employed in the analysis. The TNB phenotype included NBA, stillborn  
334 and mummified piglets. The PD dead was calculated as  $1 - (NBA/TNB)$ . The LBW was  
335 calculated as the mean weight of the number of live piglets at processing, which occurred  
336 within 48 h from birth. Traits that were recorded after birth, including PWM, NW and  
337 NWBW, are impacted by the degree of cross-fostering. Cross-fostering in the current data  
338 was similar to previous estimates by Putz et al. (2015) in a related population. To  
339 minimize the effect of cross-fostering only litters having more than 75 % of the birth sow  
340 piglets were utilized in the analysis. After the data edit, 98.0 and 97.7 % of the piglets  
341 were nursed by their original birth sow for LW and LR, respectively. The PWM mortality  
342 phenotype was calculated as the number of piglets that died after 24 hours including pigs  
343 euthanized at weaning divided by the total number of pigs in the litter after the 24-hour

344 cutoff. The NWBW was calculated as the average weight of the number of piglets  
345 weaned. All reproductive traits were evaluated as a trait of the biological dam. The fixed  
346 effects utilized for each trait are outlined in **Table 1**. A random additive genetic and  
347 permanent environmental effect of the dam were included in the analysis (i.e. similar to  
348 Model 1 described in the section outlining the algorithm).

349 Two production traits were investigated: body weight at off-test and average body  
350 weight gain from birth to off-test (i.e. body weight at off-test / age at off-test). Production  
351 traits were evaluated as a trait of the animal. Since animals only have one observation the  
352 permanent environmental effect was in this case excluded. The fixed effects utilized for  
353 each trait are described in **Table 1**. Across both reproductive and production traits, the  
354 contemporary group (CG) was comprised of farm, year and season and any animal that  
355 was within a CG smaller than 5 was removed from the analysis.

356 Summary statistics on the length of ROH and the unfavorable haplotypes captured  
357 were generated. Prediction accuracy for IIL was compared with a whole genome  
358 regression BRR model. For all 9 traits, yield deviations were constructed for each trait  
359 based on the fixed effects outlined in **Table 1**. For the reproductive traits, an animal may  
360 have multiple observations and therefore average yield deviations were used and the  
361 residuals for a given observation in the BRR analysis was weighted according to Garrick  
362 et al. (2009). The formula used to calculate the weight was:

363 
$$\frac{(1-h^2)}{h^2 + \frac{1+r^2(l-1)}{l} - h^2},$$

364 where  $h^2$  refers to the heritability,  $r^2$  refers to the repeatability and  $l$  refers to the number  
365 of records. The values used for  $h^2$  and  $r^2$  are outlined in **Table 1** across all nine traits.

366 Utilizing ‘BGLR’ (Perez and de los Campos, 2014), a total of 155,000 iterations were run





389           A summary of how effectively the algorithm identified true negative and positive  
390 ROH effects across different percentiles is outlined in **Panel 1 of Figure 2**. Since the  
391 algorithm only tests for the unfavorable direction, the percentage of true ROH effects the  
392 method identifies is expected to be greater than zero in the negative direction and zero in  
393 the positive direction. As illustrated in **Panel 1 of Figure 2**, as the true negative  
394 unfavorable ROH effect got larger, a greater proportion of unfavorable ROH genotypes  
395 was identified by the algorithm. It should be noted that, averaged across all scenarios, the  
396 frequency of highly unfavorable ROH effects was small (1.8 %) compared to the total  
397 number of true negative ROH effects. The frequency of incorrectly identified positive  
398 ROH effects (i.e. false-positives) by the algorithm remained relatively flat across all  
399 percentiles and was on average (95% confidence interval (CI)) 9.4 (8.7-10.1) percent  
400 across all scenarios. As the LD in the population increased and became similar to that of  
401 most livestock populations, the algorithm was more effective at identifying unfavorable  
402 haplotypes and had a lower false-positive rate. For example, for true ROH effects with  
403 the largest negative effect (i.e. less than the 0.05 percentile), the algorithm identified on  
404 average (95% CI) 32.1 (28.5-35.7) and 41.2 (36.7-45.9) percent of the total true negative  
405 ROH effects across the three QTL scenarios for the low and high LD scenarios,  
406 respectively. Conversely, for incorrectly identified true ROH effects (i.e. estimated to be  
407 negative, but had a true positive effect) with the largest positive effect (i.e. greater than  
408 the .95 percentile), the algorithm identified on average (95% CI) 15.3 (13.9-16.7) and 9.6  
409 (8.2-10.9) percent of the total true ROH effects across the three QTL scenarios for the  
410 low and high LD scenario, respectively.

411 Summary statistics on the length of ROH of at least 1 Mb tagged by the  
412 unfavorable haplotype is outlined in **Panel 2 of Figure 2**. We report the median in this  
413 case, rather the mean, since the distribution of the length of ROH containing a tag  
414 haplotype has a heavy tail and thus the latter parameter is heavily influenced by extreme  
415 values. The length of ROH tagged by the identified haplotypes for the medium-high and  
416 high LD scenarios was similar across negative percentiles and QTL scenarios with a  
417 median (1<sup>st</sup> quartile – 3<sup>rd</sup> quartile) of 12.15 (10.07-13.41). The haplotypes identified for  
418 the low and low-med LD scenarios across negative percentiles and QTL tagged longer  
419 ROH stretches with a median length of 15.77 (12.23-18.64). The results show how the  
420 core unfavorable haplotype identified by the algorithm, which had a median length of 7.0  
421 kilobases (kb) across scenarios, in reality serves as a proxy for a much larger observed  
422 ROH segment. The length of unfavorable ROH that the algorithm missed was made of  
423 considerably smaller ROH (median (1<sup>st</sup> quartile – 3<sup>rd</sup> quartile): 5.26 (4.06-5.81) Mb) and  
424 was again similar across negative percentiles and scenarios. For the incorrectly identified  
425 true positive ROH effects, it should be noted that the length of ROH captured by the  
426 haplotype gets longer proportional to the true ROH effect. Thus, in general, falsely  
427 identified ROH regions were in our analysis characterized by being locally negative  
428 around the identified unfavorable haplotype. Yet as a result of being part of an extremely  
429 large ROH, positive QTL effects contained in the long ROH genotype made the overall  
430 effect positive.

431 The relationship of IIL with the true genetic signal, the predictive ability of ILL  
432 compared to whole genome regression values and the significance of IIL or genome-wide  
433 inbreeding regression coefficients are outlined in **Figure 3. Panel 1 of Figure 3** describes

434 the correlation between IIL with TGV, TBV, and TDD. Across all QTL scenarios, the  
435 correlation increased as the LD increased for all parameters except for TDD. Averaged  
436 (95% CI) across QTL scenarios the correlation between IIL and the TGV for the low and  
437 high LD scenario was 0.31 (0.29-0.32) and 0.44 (0.42-0.45), respectively. The correlation  
438 between IIL and TBV were similar to the correlations between IIL and TGV. The  
439 average (95% CI) correlation between IIL and TDD was 0.002 (-0.01-0.01) for all  
440 scenarios, which was not unexpected, given the fact that the ROH effects are a function  
441 of the alternative homozygote genotypes and not heterozygous genotypes.

442 **Panel 2 and 3 of Figure 3** summarize the effectiveness of using the IIL algorithm  
443 based on its predictive ability or as a tool to minimize the frequency of unfavorable  
444 haplotypes in the progeny. As outlined in **Panel 2 of Figure 3**, the correlation between  
445 IIL and the phenotype increased as the level of LD increased in the population. Averaged  
446 (95% CI) across QTL scenarios, the prediction accuracy of IIL was 0.34 (0.32-0.36) and  
447 0.49 (0.47-0.52) for the low and high LD scenarios, respectively. Similar trends of  
448 increasing prediction accuracy as the LD in a population increased were seen, as  
449 expected, for the whole genome prediction values and minor differences were found  
450 between the prediction accuracy for EGV and EBV. Averaged (95% CI) across QTL  
451 scenarios, the prediction accuracy of EGV was 0.66 (0.64-0.67) and 0.82 (0.79-0.84) for  
452 the low and high LD scenarios, respectively. These results are not unexpected since the  
453 algorithm only utilizes haplotypes that have an unfavorable effect contained within ROH  
454 stretches and favorable haplotypes are not included in IIL. The correlations between IIL  
455 and values from the whole-genome regression model are outlined in **Figure S2 Panel 1**.

456 Averaged (95% CI) across scenarios the correlation between IIL and EGV was 0.50  
457 (0.49-0.50) and in general as the LD increased so did the correlation.

458 The last summary statistic is outlined in **Panel 3 of Figure 3** and outlines the  
459 significance of the regression coefficient based on either genome wide inbreeding metrics  
460 or IIL. Across all genome-wide inbreeding metrics the  $-\log p\text{-value}$  was similar across all  
461 LD scenarios, and the significance increased proportionally to the number of QTL. For  
462 example, averaged (95% CI) across scenarios and genome-wide inbreeding metrics, the  
463 average  $-\log p\text{-value}$  were 1.12 (1.01-1.23) and 1.68 (1.49-1.87) for the scenarios with  
464 250 and 1000 QTL, respectively. The  $-\log p\text{-value}$  for the IIL metric across all scenarios  
465 was in all cases greater and increased as the LD in the population increased. Under the  
466 high LD scenario the average (95% CI)  $-\log p\text{-value}$  for the IIL metric across QTL  
467 scenarios was 21.24 (19.37-23.10), corresponding to a nominal p-value of  $5.96e^{-10}$ .

468 In summary, the simulation results highlight that the algorithm identified on  
469 average 41 % of the highly unfavorable (i.e. 0.05 percentile) ROH effects across the QTL  
470 scenarios and under the high LD scenario. Moreover, the unfavorable haplotypes were  
471 effective at tagging a significantly larger ROH region. Under the high LD scenario,  
472 which closely resembles most livestock situations, the ROH that the haplotype tagged  
473 had a median length of 12.1 Mb. When combining all unfavorable haplotypes based on  
474 their probability of occurring and the effect of the haplotype being in a ROH, a moderate  
475 prediction accuracy was achieved. Furthermore, the correlation between IIL and the  
476 EGV was moderate and more importantly less than unity in all cases. Therefore, a  
477 combination of IIL and a genome-wide genetic value would allow for two animals with

478 similar genetic values but differ in the number of unfavorable haplotypes contained  
479 within long ROH to be distinguished.

#### 480 *Swine Data*

481 To determine whether similar results were found with real data and to investigate  
482 its effectiveness across multiple traits, the algorithm was tested with two swine  
483 commercial maternal lines. The significance of the regression coefficient and the  
484 predictive ability of ILL compared to genome-wide inbreeding metrics is presented in  
485 **Table 2**. Across both breeds and for the majority of traits except for NBA and TNB in  
486 LR, ILL had a prediction accuracy greater than 0. Averaged ( $\pm$  SD) across traits within a  
487 breed, the average prediction accuracy was 0.15 ( $\pm$  0.13) and 0.20 ( $\pm$  0.04) for LR and  
488 LW, respectively. Similar to the simulation, the whole genome regression based EGV  
489 resulted in higher prediction accuracies compared to ILL across all traits and breed. The  
490 prediction accuracy averaged ( $\pm$  SD) across traits within a breed was 0.48 ( $\pm$ 0.10) and  
491 0.49 ( $\pm$ 0.17) for LR and LW, respectively. Both prediction accuracies were lower than  
492 what was achieved in the simulation, given the lower heritability for most of the traits and  
493 the simplified assumptions employed in the simulation. The correlations between ILL and  
494 values from the whole-genome regression model are outlined in the bottom of **Figure S2**  
495 **Panel 2**. Averaged ( $\pm$  SD) across traits within a breed the correlations between the ILL  
496 and EGV were 0.31 ( $\pm$  0.13) and 0.32 ( $\pm$  0.06) for LR and LW, respectively. A positive  
497 correlation (Averaged  $\pm$  SD: LR = 0.07  $\pm$  0.06; LW = 0.15  $\pm$  0.07) was estimated  
498 between ILL and EDD.

499 Also, outlined in **Table 2** is the  $-\log p$ -value of the regression coefficient when  
500 genome-wide inbreeding or ILL values were included in the model. Averaged across

501 traits within a breed, the ILL regression coefficient resulted in a higher  $-\log p\text{-value}$  (i.e.  
502 lower p-value) across both breeds compared to any genome-wide inbreeding metric,  
503 while the pedigree based inbreeding metric had the lowest  $-\log p\text{-value}$ . Out of the 9  
504 traits, the regression coefficient was trending towards significance (P-value < 0.10) for 6  
505 and 7 out of the 9 traits for LR and LW, respectively. Alternatively, the regression  
506 coefficient for the genome-wide metrics for LR (LW), was trending toward significance  
507 for 3 (4), 2 (2) and 0 (0) of the 9 for the proportion of the genome homozygous, diagonals  
508 of **SNPRM** or pedigree-based inbreeding, respectively. Thus, in our results ILL was the  
509 parameter that more closely aligned with the identification of functional inbreeding. It  
510 should be noted that, no single parameter had a consistently higher  $-\log p\text{-value}$  across  
511 traits so that a combination of genome-wide inbreeding metric based on genomic  
512 information and the ILL value would likely be optimal in breeding applications.

513 An ideogram of regions of the genome where an unfavorable haplotype was  
514 identified by the algorithm across the 9 traits for the two lines is depicted in **Figure S3**  
515 and **S4**, respectively. Regions of the genome where long unfavorable stretches of  
516 homozygosity were observed across multiple traits/line. Conversely, other regions did not  
517 appear to harbor unfavorable stretches of homozygosity. The number of regions that have  
518 an unfavorable effect across at least 4 of the 9 traits is outlined in **Table 3** and placed into  
519 categories based on the relationship between the traits. A summary of the regions and the  
520 least square mean difference between an animal in an ROH versus nonROH across both  
521 breeds is outlined in **Table S2**. A total of 4 and 13 regions were found that had at least  
522 one production and reproduction trait affected by a tag haplotype in LR and LW,  
523 respectively. A total of 3 regions across both breeds were associated only with

524 reproductive traits. Summary statistics on the median ROH length that the unfavorable  
525 haplotype tagged and the average frequency of the ROH genotype across traits and  
526 breeds is outlined in **Table S3**. The average median length of the unfavorable haplotype  
527 across trait and breeds was 1.56 and 1.54 Mb for LR and LW, respectively. Similarly to  
528 what found in simulated data, the unfavorable haplotype tagged a larger ROH of 9.55 and  
529 9.12 Mb averaged across traits within LR and LW, respectively, corresponding to  
530 (averaged across traits) 172 and 156 SNP for LR and LW, respectively.

531       Lastly, the correlation between the diagonals and off-diagonals of **ILM** for each  
532 trait and genome-wide relationship matrices is presented in **Figure S5** and **S6** for LR and  
533 LW, respectively. As shown by the lower diagonal of each matrix, correlations between  
534 the off-diagonal elements of the ILM across all traits and genome-wide relationships are  
535 all favorably correlation. Any change in the off-diagonal **ILM** value for one trait would  
536 result in a similar (in the favorable direction) or negligible change in other traits. The  
537 average off-diagonal elements across traits for LR had an absolute correlation of 0.23,  
538 0.28 and 0.34 for A, SNPRM and ROH5RM, respectively. Slightly lower correlations  
539 were found for LW and averaged across traits the absolute correlation was 0.14, 0.20 and  
540 0.21 for A, SNPRM and ROH5RM, respectively. In general, the correlations between the  
541 IIL values across traits and genome-wide inbreeding metrics were similar to the off-  
542 diagonals and the majority of them were in the same direction. In some instances, the  
543 correlations between the values were antagonistic, for example LR between the SNPRM  
544 and the IIL values across all traits, although the correlations between the genome-wide  
545 inbreeding metrics were much lower compared to the off-diagonal elements.

546

## DISCUSSION



547           The objective of this study was to implement a strategy to identify haplotypes  
548 within long ROH that tag an IBD segment due to recent inbreeding. Haplotypes within  
549 ROH were targeted since previous results via simulation by Keller et al. (2011) have  
550 shown that ROH based genome-wide inbreeding metrics have a higher association with  
551 the recessive mutation load compared to pedigree or SNP-by-SNP based inbreeding  
552 metrics. The rationale behind the algorithm proposed stems from previous research  
553 investigating the phenotypic effect of a region being in an ROH (Pryce et al., 2014;  
554 Howard et al., 2015; Saura et al., 2015). One of the major pitfalls of previously utilized  
555 methods is that they assume that any ROH genotype within a region of interest has an  
556 unfavorable effect, which is most likely not the case. Instead, the unfavorable effect is  
557 likely due to a single unique ROH genotype with the remaining ones resulting in no  
558 unfavorable effect. Thus, the necessity of identifying unique ROH genotypes associated  
559 with an unfavorable phenotype. The primary outcome of the proposed algorithm is a list  
560 of unfavorable haplotypes. Multiple algorithms already exist to manage unfavorable  
561 mutations or haplotypes within breeding programs so that the ones identified by the  
562 algorithm could be easily incorporated into previously developed pipelines (Kinghorn,  
563 2011; Cole, 2015).

564           Within the algorithm, multiple aggregation steps are implemented to confine the  
565 unfavorable haplotype to the core of the observed ROH genotype in a way that is  
566 consistent across individuals. As result of the aggregation step, each haplotype serves as a  
567 tag for a much larger ROH segment. In this regard, the data presented confirm that the  
568 aggregation steps are successful in identifying tag haplotypes contained within a much  
569 larger ROH genotype. Across both swine breeds and in the simulated data set, the median

570 length of the ROH the haplotype tagged was greater than 9 Mb and the tag haplotype was  
571 around 1 Mb. Furthermore, simulation results highlighted that the true ROH effects that  
572 were not identified were shorter ROH (5.26 Mb) compared to the ones that were  
573 identified (13.96). The ability to capture short IBD regions depends on the marker density  
574 as described by Ferenčaković et al. (2013) and the marker density utilized in the current  
575 study might not be sufficient to capture these short IBD regions effectively. The impact  
576 of the density was not investigated here to limit the number of scenarios generated, yet its  
577 impact should be considered in the future. Lastly, the simulation highlighted how in some  
578 cases the algorithm incorrectly identified true positive ROH effects that were  
579 characterized as being much longer compared to correctly identified negative ROH  
580 effects. The distribution of the length of ROH has a heavy tail and therefore the  
581 frequency of long ROH is low, but they do exist within the genome across individuals.  
582 These incorrectly identified true positive ROH regions were locally negative around a tag  
583 unfavorable haplotype, but being in longer than average ROH their combined effect was  
584 ultimately positive.

585 We investigated the ability of the algorithm to identify unfavorable haplotypes  
586 and their potential use. The frequency at which ROH occurs within the genome had a  
587 large impact on the ability of the algorithm to identify unfavorable haplotypes. Medium-  
588 high and high LD scenarios have LD patterns similar to those observed in livestock  
589 species. Under these premises the algorithm was effective at capturing unfavorable  
590 genomic regions. The proportion of highly unfavorable ROH genotypes (i.e. < 0.05  
591 percentile) that the algorithm captured under the high LD scenario varied across QTL  
592 scenarios. As the number of QTL increased the proportion of ROH genotypes captured

593 decreased. The average (95% CI) proportion of highly unfavorable ROH genotypes the  
594 algorithm captured was 0.52 (0.42-0.62), 0.39 (0.32-0.46) and 0.33 (0.27-0.39) for the  
595 scenarios with 250, 500 and 1000 QTL, respectively. The prediction accuracy based on  
596 real data (average  $\pm$  SD: 0.17 $\pm$ 0.10) was roughly half of what was observed with the  
597 simulated data (high LD scenario mean (95% confidence interval (CI)): 0.49 (0.47-0.52)),  
598 although across the majority of traits, IIL had a prediction accuracy that was greater than  
599 zero. A prediction accuracy near zero was observed in LR for NBA and TNB, which may  
600 be due to multiple factors including purging of unfavorable ROH genotypes due to strong  
601 selection for initial litter size within the line as well as a smaller dataset than the one used  
602 in the LW population. In our study, whole genome regression based EGV resulted in a  
603 moderate predictive ability (average  $\pm$  SD across trait and breed: 0.48 $\pm$ 0.14). The use of a  
604 whole-genome regression method to benchmark the algorithm was used to illustrate the  
605 limitations of the algorithm. The algorithm only test for regions contained in longer ROH  
606 resulting in an unfavorable phenotype and should be used in conjunction with other  
607 methods to increase the overall genomic variability and limit the accumulation of  
608 inbreeding. Importantly, a moderate positive correlation between IIL and EGV was  
609 observed in the simulated (high LD scenario mean (95% confidence interval (CI)): 0.54  
610 (0.53-0.56)) and swine (average  $\pm$  SD: 0.31 $\pm$ 0.10) datasets. Thus, the combination of the  
611 two metrics could allow for a breeder to more effectively manage the risks associated  
612 with sire or mate selection, allowing to better evaluate the trade-off between the genetic  
613 value of the progeny and undesirable side effects associated with inbreeding. Lastly, the  
614 use of the algorithm along with methods to identify lethal mutations/haplotypes

615 (VanRaden et al., 2011) would allow breeders to comprehensively manage genomic  
616 diversity and recessive load in a population.

617 The two maternal lines utilized in this study have been under intense selection for  
618 multiple generations, which has potentially resulted in high and heterogeneous levels of  
619 homozygosity across the genome. This has been investigated recently by Howard et al.  
620 (2016), which estimated the proportion of the genome in a ROH of at least 5 Mb to be  
621 0.17 and 0.19 for LR and LW, respectively. Furthermore, nearly all chromosomes across  
622 both breeds contained regions of the genome with high levels of ROH. Under this  
623 premise, it is likely that the impact of genome-level homozygosity would be regressed  
624 toward zero, since homozygosity in some regions of the genome would no longer be  
625 unfavorable. This result is partially verified by the ideogram outlined in **Figure S3** and  
626 **S4**, whereby some regions of the genome have unfavorable haplotypes spread across  
627 multiple traits and other do not have any unfavorable regions. The impact of haplotypes  
628 contained within an ROH for regions that were significant across multiple traits can be  
629 quite large. For example, an animal homozygous for a tag haplotype on SS9 (28.9-30.6)  
630 within the LR breed would be predicted to have 1.66 fewer pigs born alive, 1.32 fewer  
631 total pigs born, 4.0 % more pigs born dead and the litter would be on average 0.07 kg  
632 smaller than an animal not being homozygous for the tag haplotype.

633 In general, the genetic diversity of a population is managed through the  
634 relationship of the parents based on the expectation that the inbreeding in the progeny is  
635 equal to half of the coancestry between the parents (Falconer and Mackay, 1996). As  
636 previously discussed, since inbreeding depression is heterogeneous across the genome, a  
637 measure that has a higher relationship with the genetic load of an individual may serve as

638 a better metric to manage the degree of inbreeding depression that exists within a  
639 population. Therefore, linear mixed models (i.e. Model 1 described in the section  
640 outlining the algorithm) that included either genome-wide inbreeding metrics or the **ILL**  
641 value in predicting a phenotype were evaluated and the corresponding  $-\log p\text{-value}$  was  
642 estimated for each specific inbreeding regression coefficient. Across all simulated  
643 scenarios and on average across both swine breeds, the significance of the regression  
644 coefficient for the **ILL** value was higher compared to any other genome-wide metric. Yet  
645 for some traits genome-wide metrics were more significant. When both the most  
646 significant genome-wide inbreeding metric and **ILL** were included in the model, similar  
647 significance values remained. This highlight how genome-wide inbreeding and **ILL**  
648 metrics are capturing different signals. Based on our results, a combination of a genome-  
649 wide relationship matrix and **ILM** could be useful in effectively manage the risks  
650 associated with choosing an individual/mating combination. Future research should look  
651 at the long-term benefits of including the **ILM** in mating designs in terms of diversity and  
652 genetic load. Also, methods to incorporate multiple metrics including the genetic value,  
653 genetic diversity, lethal mutations and the unfavorable haplotypes from the algorithm into  
654 an index value should be developed.

655 Breeding objective are in the near totality of cases comprised of several  
656 economically important traits and thus the relationship between the **ILM** across traits is  
657 of importance. For the two breeds investigated the off-diagonal values across all traits  
658 resulted in a favorable or negligible change across all traits. Thus, the use of the **ILM**  
659 matrix for a given trait would result in a favorable increase or negligible change in the  
660 phenotype of the remaining traits. Furthermore, based on genome-wide relationship

661 metrics (i.e. pedigree or genomic), the off-diagonals elements are favorably correlated  
662 with off-diagonal elements of the **ILM** matrix across traits and breeds. Therefore, as one  
663 changes the **ILM** values in the favorable direction, the relationship across mating pairs is  
664 reduced, which is desirable and expected. Future research should investigate methods to  
665 combine **ILM** across traits in the breeding objective. In general, the diagonal values had  
666 similar trends as the off-diagonals across traits and relationship matrices. One of the  
667 major differences between the two values related to an antagonistic relationship for LR  
668 between the SNPRM and the IIL values across all traits. The inbreeding correlations had  
669 a much lower correlation than off-diagonals elements and even more so within the LR  
670 breed.

671         In the present study variance components were not re-estimated for each window  
672 in Stage 2, which may have impacted the t-statistic. We utilized ASreml, which does re-  
673 estimate the variance components for each window, to determine the sensitivity of fixing  
674 variance components. The difference between the T-statistic from the algorithm and the  
675 one from ASReml is outlined in **Table S4**. Across all breeds and traits, the differences  
676 between the two were negligible. In addition, across all breeds and traits the T-statistic  
677 from the algorithm gave a conservative estimate compared to the ones derived from  
678 ASreml. The algorithm proposed may tag short haplotypes instead of long ones that  
679 aren't most likely IBD segments as a result of recent inbreeding. Averaged across traits  
680 the proportion of ROH genotypes that were below 1, 2 and 3 Mb with LR (LW) was 2.0  
681 (1.7), 8.3 (8.4) and 16.0 (16.2) percent, respectively. The algorithm trapped short ROH  
682 genotypes (albeit at a low frequency). Further improvements of the algorithm in the  
683 future should focus on reducing the frequency of trapping short ROH.

684 Previous studies have investigated ROH effects by accounting for the additive  
685 genotypic value of the region in the model by either including SNP contained within the  
686 region investigated (Pryce et al., 2014) or using phenotypes that have been corrected for  
687 the additive effect (Howard et al., 2015). When utilizing a separate model for each  
688 window, the simulation and swine data sets have illustrated that the ROH tagging  
689 haplotype can span many Mb and is variable across animals within and across windows.  
690 Therefore, the number of SNP to include before and after the haplotype in the model to  
691 account for the additive effect for a given region is difficult to determine. More  
692 importantly, the independence between additive and dominance effects in the classical  
693 treatment (Falconer and Mackay, 1996) is to an extent a convenient artifact that allows  
694 orthogonally of the additive and dominance estimates. In reality, and as outlined in  
695 Huang & Mackay (2016), depending on the parameterization of the model the variance  
696 explained by either additive, dominance or epistasis can be rearranged and placed more  
697 heavily into any of the three categories. This is chiefly due to the fact that three effects  
698 are in real situation non-orthogonal to each other, so that the variance from a particular  
699 effect can be “consumed” by another effect. This is an important point as additive and  
700 dominance are two intrinsically inseparable terms, since if an allele is dominant over  
701 another ( $a \neq 0$ ,  $d \pm a$ ), there must necessarily be additive homozygous effects ( $a \neq 0$ ;  
702 Huang and Mackay, 2016). The non-orthogonal relationship between additive and  
703 dominance effects has been confirmed with real data (Wellmann and Bennewitz, 2011;  
704 Wellmann and Bennewitz, 2012). The non-orthogonal relationship was also observed in  
705 the current simulation study. The correlation between ILL and true dominance deviation  
706 was essentially 0 across all scenarios, although a positive correlation (0.14) was observed

707 between ILL and the estimated dominance deviation EDD was observed. Under this  
708 premise, the ability to efficiently estimate the additive and dominance effect and their  
709 potential interactions for QTL that are at a low frequency is severely reduced. Lastly, the  
710 application of the associated haplotypes identified in mating plans when correcting for  
711 the additive effect is even more complex due to a lack of clear interpretation between the  
712 combined additive and ROH effect for a window. Therefore, in our analysis priority was  
713 given to estimating the genotypic value of ROH segments that are susceptible to  
714 displaying reduced performance based on the combined genotypic value of the given  
715 segment. Based on this premise, we make no attempt at trying to understand the number  
716 of mutations present within the ROH, the degree of epistasis that occurs or the  
717 inheritance pattern of QTL within the segment.

### 718 *Conclusions*

719 We have outlined an algorithm that identifies unfavorable haplotypes contained  
720 within an ROH that give rise to a reduced phenotype. Across simulated and real datasets  
721 the unfavorable haplotype tags a much larger ROH region that has a high probability of  
722 being IBD due to its length. Furthermore, the accuracy of prediction for the majority of  
723 the traits was greater than zero. On the real swine datasets, multiple haplotypes were  
724 identified that had a consistent unfavorable effect across multiple traits. The use of this  
725 algorithm and the associated haplotypes allow for breeding programs to more effectively  
726 identify unfavorable regions and mating programs can be used to minimize the frequency  
727 of ROH occurring in the next generation.

728

### **LITERATURE CITED**



- 729 Charlesworth, D., and B. Charlesworth. 1987. Inbreeding Depression and its  
730 Evolutionary Consequences. *Annu. Rev. Ecol. Syst.* 18:237-268.
- 731 Chen, G. K., P. Marjoram, and J. D. Wall. 2009. Fast and flexible simulation of DNA  
732 sequence data. *Genome Res.* 19(1):136-142. doi: 10.1101/gr.083634.108.
- 733 Cole, J. B. 2015. A simple strategy for managing many recessive disorders in a dairy  
734 cattle breeding program. *Genet. Sel. Evol.* 47:94. doi: 10.1186/s12711-015-0174-  
735 9.
- 736 Falconer, D. S., and T. F. C. Mackay. 1996. Introduction to quantitative genetics. 4th  
737 Edition. Longman Scientific and Technical, New York.
- 738 Ferenčaković, M., J. Sölkner, and I. Curik. 2013. Estimating autozygosity from high-  
739 throughput information: effects of SNP density and genotyping errors. *Genet. Sel.*  
740 *Evol.* 45:42. doi: 10.1186/1297-9686-45-42.
- 741 Garrick, D. J., J. F. Taylor, and R. L. Fernando. 2009. Deregressing estimated breeding  
742 values and weighting information for genomic regression analyses. *Genet. Sel.*  
743 *Evol.* 41:55. doi: 10.1186/1297-9686-41-55.
- 744 Gilmour, A., B. Cullis, S. Welham, B. Gogel, and R. Thompson. 2004. An efficient  
745 computing strategy for prediction in mixed linear models. *Comput. Stat. Data*  
746 *Anal.* 44(4):571-586. doi:10.1016/S0167-9473(02)00258-X.
- 747 Gilmour, A. R., B. J. Gogel, B. R. Cullis, and R. Thompson. 2009. ASReml User Guide  
748 Release 3.0.
- 749 Henderson, C. R. 1976. A Simple Method for Computing the Inverse of a Numerator  
750 Relationship Matrix Used in Prediction of Breeding Values. *Biometrics.* 32(1):69-  
751 83. doi: 10.2307/2529339.

- 752 Howard, J. T., M. Haile-Mariam, J. E. Pryce, and C. Maltecca. 2015. Investigation of  
753 regions impacting inbreeding depression and their association with the additive  
754 genetic effect for United States and Australia Jersey dairy cattle. *BMC Genomics*.  
755 16:813. doi: 10.1186/s12864-015-2001-7
- 756 Howard, J. T., F. Tiezzi, Y. Huang, K. A. Gray, and C. Maltecca. 2016. Characterization  
757 and management of long runs of homozygosity in parental nucleus lines and their  
758 associated crossbred progeny. *Genet. Sel. Evol.* 48:91. doi:10.1186/s12711-016-  
759 0269-y.
- 760 Howard, J. T., F. Tiezzi, J. E. Pryce, and C. Maltecca. In Press. A combined coalescence  
761 forward in time simulator software for pedigreed populations undergoing  
762 selection for complex traits. *J. Anim. Breed. Genet.*
- 763 Huang, W., and T. F. C. Mackay. 2016. The Genetic Architecture of Quantitative Traits  
764 Cannot Be Inferred from Variance Component Analysis. *PLoS Genet.*  
765 12:e1006421. doi:10.1371/journal.pgen.1006421.
- 766 Keller, M. C., P. M. Visscher, and M. E. Goddard. 2011. Quantification of inbreeding  
767 due to distant ancestors and its detection using dense single nucleotide  
768 polymorphism data. *Genetics*. 189(1):237-249. doi: 10.1534/genetics.111.130922.
- 769 Kinghorn, B. P. 2011. An algorithm for efficient constrained mate selection. *Genet. Sel.*  
770 *Evol.* 43:4. DOI: 10.1186/1297-9686-43-4.
- 771 Knol, E. F., B. Nielsen, and P. W. Knap. 2016. Genomic selection in commercial pig  
772 breeding. *Anim. Front.* 6(1):15–22. doi:10.2527/af.2016-0003.

- 773 Legarra, A., C. Robert-Granie, E. Manfredi, and J.-M. Elsen. 2008. Performance of  
774 Genomic Selection in Mice. *Genetics*. 180(1):611-618.  
775 doi:10.1534/genetics.108.088575.
- 776 Lopes, M. S., J. W. M. Bastiaansen, L. Janss, E. F. Knol, and H. Bovenhuis. 2016.  
777 Genomic prediction of growth in pigs based on a model including additive and  
778 dominance effects. *J. Anim. Breed. Genet.* 133(3):180-186. doi:  
779 10.1111/jbg.12195.
- 780 Lopes, M. S., F. F. Silva, B. Harlizius, N. Duijvesteijn, P. S. Lopes, S. E. Guimarães, and  
781 E. F. Knol. 2013. Improved estimation of inbreeding and kinship in pigs using  
782 optimized SNP panels. *BMC Genet.* 14:92. DOI: 10.1186/1471-2156-14-92.
- 783 Perez, P., and G. de los Campos. 2014. Genome-Wide Regression and Prediction with the  
784 BGLR Statistical Package. *Genetics*. 198(2):483-495.  
785 doi:10.1534/genetics.114.164442.
- 786 Pryce, J. E., M. Haile-Mariam, M. E. Goddard, and B. J. Hayes. 2014. Identification of  
787 genomic regions associated with inbreeding depression in Holstein and Jersey  
788 dairy cattle. *Genet. Sel. Evol.* 46:71. doi: 10.1186/s12711-014-0071-7.
- 789 Putz, A. M., F. Tiezzi, C. Maltecca, K. A. Gray, and M. T. Knauer. 2015. Variance  
790 component estimates for alternative litter size traits in swine. *J. Anim. Sci.*  
791 93(11):5153-5163. doi:10.2527/jas.2015-9416.
- 792 Saura, M., A. Fernández, L. Varona, A. I. Fernández, M. Á. R. de Cara, C. Barragán, and  
793 B. Villanueva. 2015. Detecting inbreeding depression for reproductive traits in  
794 Iberian pigs using genome-wide data. *Genet. Sel. Evol.* 47:1. doi:  
795 10.1186/s12711-014-0081-5.

- 796 Simmons, M. J., and J. F. Crow. 1977. Mutations affecting fitness in *Drosophila*  
797 populations. *Annu. Rev. Genet.* 11:49-78. doi:  
798 10.1146/annurev.ge.11.120177.000405.
- 799 VanRaden, P. M. 2008. Efficient methods to compute genomic predictions. *J Dairy Sci.*  
800 91(11):4414-4423. doi: 10.3168/jds.2007-0980.
- 801 VanRaden, P. M., K. M. Olson, D. J. Null, and J. L. Hutchison. 2011. Harmful recessive  
802 effects on fertility detected by absence of homozygous haplotypes. *J. Dairy Sci.*  
803 94(12):6153–6161. doi:10.3168/jds.2011-4624.
- 804 Welham, S., B. Cullis, B. Gogel, A. Gilmour, and R. Thompson. 2004. Prediction in  
805 linear mixed models. *Aust. N. Z. J. Stat.* 46(3):325-347. doi:10.1111/j.1467-  
806 842X.2004.00334.x.
- 807 Wellmann, R., and J. Bennewitz. 2011. The contribution of dominance to the  
808 understanding of quantitative genetic variation. *Genet. Res. Camb.* 93(2):139-154.  
809 doi: 10.1017/S0016672310000649.
- 810 Wellmann, R., and J. Bennewitz. 2012. Bayesian models with dominance effects for  
811 genomic evaluation of quantitative traits. *Genet. Res. Camb.* 94(1):21-37. doi:  
812 10.1017/S0016672312000018.
- 813 Wolc, A., C. Stricker, J. Arango, P. Settar, J. E. Fulton, N. P. O’Sullivan, R. Preisinger,  
814 D. Habier, R. Fernando, D. J. Garrick, S. J. Lamont, and J. C. Dekkers. 2011.  
815 Breeding value prediction for production traits in layer chickens using pedigree or  
816 genomic relationships in a reduced animal model. *Genet. Sel. Evol.* 43:5.  
817 doi:10.1186/1297-9686-43-5.

818 Xiang, T., O. F. Christensen, Z. G. Vitezica, and A. Legarra. 2016. Genomic evaluation  
819 by including dominance effects and inbreeding depression for purebred and  
820 crossbred performance with an application in pigs. *Genet. Sel. Evol.* 48(1):92.  
821 doi: 10.1186/s12711-016-0271-4.

822

823

824

825

826

827

828

829

830

831

832

833

834

835

836

837

838

839

840 **Table 1.** The model utilized, estimated genetic parameters and the number of animals  
 841 across traits for the Landrace (LR) and Large White (LW) population.

| Breed  | Trait <sup>1</sup> | Fixed Effects <sup>1</sup>  | Genetic Parameters <sup>2</sup> |       | Animals (Records) |                |
|--------|--------------------|-----------------------------|---------------------------------|-------|-------------------|----------------|
|        |                    |                             | $h^2$                           | $r^2$ | Training          | Validation     |
| LR     | NBA                | Parity, CG                  | 0.082                           | 0.149 | 4,005 (9,416)     | 1,005 (1,639)  |
|        | TNB                | Parity, CG                  | 0.082                           | 0.149 | 4,003 (9,302)     | 998 (1,621)    |
|        | PD                 | Parity, CG                  | 0.085                           | 0.156 | 4,003 (9,293)     | 998 (1,621)    |
|        | LBW                | Parity, CG,<br>NBA          | 0.231                           | 0.284 | 3,985 (8,648)     | 988 (1,586)    |
|        | PWM                | Parity, CG,<br>Pig24hrs     | 0.115                           | 0.131 | 3,504 (6,724)     | 870 (1,330)    |
|        | NW                 | Parity, CG,<br>Pig24hrs     | 0.102                           | 0.120 | 3,465 (6,600)     | 845 (1,280)    |
|        | NWBW               | Parity, CG,<br>Pig24hrs, NW | 0.144                           | 0.211 | 3,465 (6,600)     | 845 (1,280)    |
|        | Weight             | CG, Sex, Age                | 0.271                           | -     | 4,386 (4,386)     | 993 (993)      |
|        | ADG                | CG, Sex, Age                | 0.271                           | -     | 4,386 (4,386)     | 993 (993)      |
|        | LW                 | NBA                         | Parity, CG                      | 0.115 | 0.150             | 5,518 (15,014) |
| TNB    |                    | Parity, CG                  | 0.098                           | 0.142 | 5,513 (14,673)    | 1,228 (2,262)  |
| PD     |                    | Parity, CG                  | 0.086                           | 0.133 | 5,513 (14,664)    | 1,228 (2,262)  |
| LBW    |                    | Parity, CG,<br>NBA          | 0.241                           | 0.307 | 5,487 (13,581)    | 1,188 (2,155)  |
| PWM    |                    | Parity, CG,<br>Pig24hrs     | 0.074                           | 0.168 | 4,966 (10,464)    | 1,102 (1,824)  |
| NW     |                    | Parity, CG,<br>Pig24hrs     | 0.053                           | 0.115 | 4,901 (10,259)    | 1,054 (1,716)  |
| NWBW   |                    | Parity, CG,<br>Pig24hrs, NW | 0.144                           | 0.203 | 4,901 (10,259)    | 1,054 (1,716)  |
| Weight |                    | CG, Sex, Age                | 0.292                           | -     | 5,576 (5,576)     | 1,197 (1,197)  |
| ADG    |                    | CG, Sex, Age                | 0.291                           | -     | 5,576 (5,576)     | 1,197 (1,197)  |

842 <sup>1</sup> NBA = number born alive; TNB = total number born; PD = proportion born dead; LBW

843 = average litter birth weight; PWM = pre-weaning mortality; NW = number weaned;

844 NWBW = average litter wean weight; Weight = weight at off-test; ADG = average daily

845 body weight gain from birth to off-test; CG = contemporary group based on farm, year

846 and season; Pig24hrs = pigs in the litter after the 24 hour cutoff; Age refers to off-test

847 age.

848 <sup>2</sup>  $h^2$  refers to the narrow sense heritability;  $r^2$  refers to the repeatability.

849 **Table 2.** The significance of inbreeding regression coefficient across multiple inbreeding  
 850 metrics and the prediction accuracy of the individual inbreeding load (IIL) and estimated  
 851 genetic value (EGV) from whole genome Bayesian Ridge Regression across traits for  
 852 Landrace (LR) and Large White (LW) populations.

| Breed | Trait <sup>1</sup> | Regression on Adjusted Phenotype $-\log(\text{P-value})^2$ |                    |                       |       | Prediction Accuracy |       |
|-------|--------------------|------------------------------------------------------------|--------------------|-----------------------|-------|---------------------|-------|
|       |                    | Pedigree Inbreeding                                        | Genomic Inbreeding | Proportion Homozygous | IIL   | EGV                 | IIL   |
| LR    | NBA                | 0.66                                                       | 0.49               | 0.69                  | 0.00  | 0.44                | -0.05 |
|       | TNB                | 0.87                                                       | 0.68               | 0.23                  | 0.53  | 0.42                | -0.09 |
|       | PD                 | 0.15                                                       | 0.00               | 1.42                  | 1.94  | 0.53                | 0.15  |
|       | LBW                | 0.45                                                       | 2.24               | 1.34                  | 15.24 | 0.65                | 0.33  |
|       | PWM                | 0.29                                                       | 1.54               | 0.8                   | 2.94  | 0.40                | 0.17  |
|       | WN                 | 0.21                                                       | 1.01               | 0.49                  | 4.00  | 0.42                | 0.22  |
|       | WNBW               | 2.14                                                       | 0.66               | 4.36                  | 2.51  | 0.64                | 0.22  |
|       | Weight             | 0.53                                                       | 4.52               | 2.93                  | 3.24  | 0.40                | 0.17  |
|       | ADG                | 0.58                                                       | 4.54               | 2.84                  | 4.00  | 0.39                | 0.18  |
|       | Average            | 0.65                                                       | 1.74               | 1.68                  | 3.82  | 0.48                | 0.15  |
| LW    | NBA                | 0.62                                                       | 0.15               | 0.12                  | 4.14  | 0.45                | 0.24  |
|       | TNB                | 0.98                                                       | 0.40               | 0.21                  | 2.56  | 0.42                | 0.19  |
|       | PD                 | 0.54                                                       | 1.35               | 1.97                  | 1.94  | 0.38                | 0.13  |
|       | LBW                | 2.18                                                       | 1.11               | 4.07                  | 10.25 | 0.77                | 0.24  |
|       | PWM                | 2.11                                                       | 0.33               | 1.37                  | 2.09  | 0.36                | 0.18  |
|       | WN                 | 1.71                                                       | 0.12               | 0.00                  | 2.91  | 0.29                | 0.25  |
|       | WNBW               | 0.00                                                       | 0.78               | 2.56                  | 3.46  | 0.79                | 0.17  |
|       | Weight             | 0.69                                                       | 5.70               | 6.14                  | 5.99  | 0.48                | 0.18  |
|       | ADG                | 0.73                                                       | 5.76               | 6.09                  | 4.77  | 0.48                | 0.17  |
|       | Average            | 1.06                                                       | 1.74               | 2.50                  | 4.23  | 0.49                | 0.20  |

853 <sup>1</sup>NBA = number born alive; TNB = total number born; PD = proportion born dead; LBW  
 854 = average litter birth weight (LBW); PWM = pre-weaning mortality; NW = number  
 855 weaned; NWBW = average litter wean weight; Weight = weight at off-test; ADG =  
 856 average daily body weight gain from birth to off-test.

857 <sup>2</sup> As a reference a p-value of 0.10, 0.05 and 0.01 is equivalent to a negative log p-value of  
 858 2.30, 3.0 and 4.6, respectively.

859

860 **Table 3.** Summary of the number of haplotypes that displayed unfavorable effects across  
861 multiple (i.e. > 4) traits for Landrace (LR) and Large White (LW) populations.

| Breed | Type of Trait <sup>1</sup>  | Number of Haplotypes |
|-------|-----------------------------|----------------------|
| LR    | Production and Reproduction | 4                    |
|       | Reproduction                | 3                    |
| LW    | Production and Reproduction | 13                   |
|       | Reproduction                | 3                    |

862 <sup>1</sup> The type of trait refers a Production trait (i.e. weight at off-test; average daily body  
863 weight gain from birth to off-test) or a Reproductive Trait (i.e. number born alive; total  
864 number born; proportion born dead; average litter birth weight; pre-weaning mortality;  
865 number weaned; average litter wean weight).

866

867

868

869

870

871

872

873

874

875

876

877

878

879



880 **Figure 1.** Overview of algorithm that identifies unfavorable haplotypes.

881 **Figure 2.** Summary<sup>1</sup> of the proportion of runs of homozygosity (ROH) of at least 1  
882 Megabase the algorithm captures (Panel 1) and the length of the ROH the haplotype tags  
883 (Panel 2) across simulation scenarios<sup>2</sup> by percentile class<sup>3</sup> and whether the algorithm  
884 identified the haplotype.

885 <sup>1</sup> The summary statistic in Panel 1 is the mean  $\pm$  95 % confidence interval and in Panel 2  
886 is the 1<sup>st</sup>, 2<sup>nd</sup> and 3<sup>rd</sup> quartiles.

887 <sup>2</sup> Refers to ancestral population scenario simulated. Scenario 1 = “Ne1000” parameter in  
888 Geno-Diver; Scenario 2 = “Ne250” parameter in Geno-Diver. Scenario 3 =  
889 “Ne100\_Scen1” parameter in Geno-Diver. Scenario 4 = “Ne70” parameter in Geno-  
890 Diver.

891 <sup>3</sup> The ROH percentile class is outlined on the x-axis and the first 4 represent quantiles for  
892 the true negative effects (i.e. 0.05 represents the highly negative ROH effects) and the  
893 last 4 represent quantiles for the true positive effects (i.e. 0.95 represent highly positive  
894 effects). The y-axis refers to the algorithms summary statistics for the number of true  
895 ROH identified out of all true ROH effects within the given quintile.

896 <sup>4</sup> The number below either negative or positive ROH refers to the percentage of the ROH  
897 that the algorithm correctly found out of the all negative or positive true ROH effects.

898 **Figure 3.** Summary (mean  $\pm$  CI)<sup>1</sup> of the correlation between individual inbreeding load  
899 (IIL) and the true genetic signal (Panel 1)<sup>2</sup>, prediction accuracy for IIL and genotypic  
900 estimates Bayesian ridge regression (Panel 2)<sup>3</sup> and significance of the regression  
901 coefficient based on either a genome wide inbreeding metrics or IIL (Panel 3)<sup>4</sup> across  
902 simulation scenarios<sup>5</sup>.

903 <sup>1</sup> CI: 95% confidence interval.

904 <sup>2</sup> TGV: true genotypic value; TBV: true additive genetic value; TDD: true dominance  
905 deviation.

906 <sup>3</sup> EGV: estimated genotypic value; EBV: estimated breeding value.

907 <sup>4</sup> Pedigree: pedigree inbreeding; Genomic: genomic inbreeding based on diagonals of  
908 genomic relationship matrix; Homozygosity: proportion of genome homozygous.

909 <sup>5</sup> Refers to ancestral population scenario simulated. Scenario 1 = “Ne1000” parameter in  
910 Geno-Diver; Scenario 2 = “Ne250” parameter in Geno-Diver. Scenario 3 =

911 “Ne100\_Scen1” parameter in Geno-Diver. Scenario 4 = “Ne70” parameter in Geno-  
912 Diver.

913 **Figure 1.** Overview of algorithm that identifies unfavorable haplotypes.

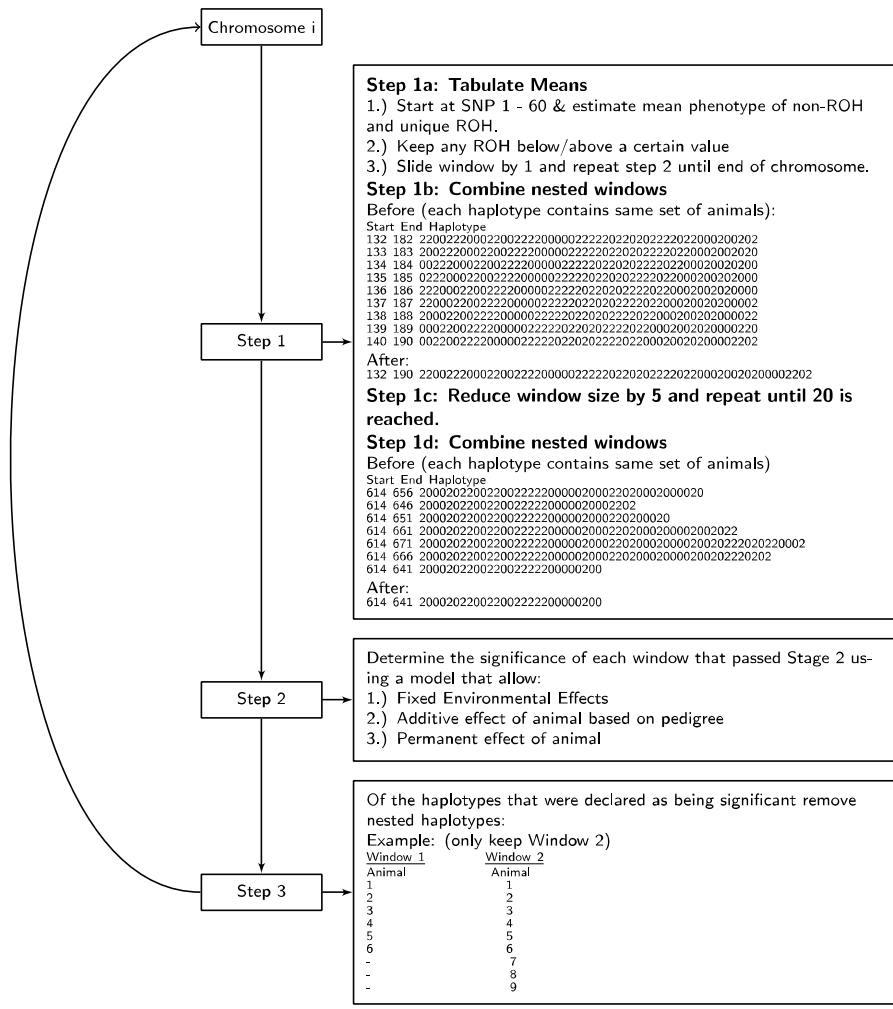

914

915 **Figure 2.** Summary<sup>1</sup> of the proportion of runs of homozygosity (ROH) of at least 1  
 916 Megabase the algorithm captures (Panel 1) and the length of the ROH the haplotype tags  
 917 (Panel 2) across simulation scenarios<sup>2</sup> by percentile class<sup>3</sup> and whether the algorithm  
 918 identified the haplotype.

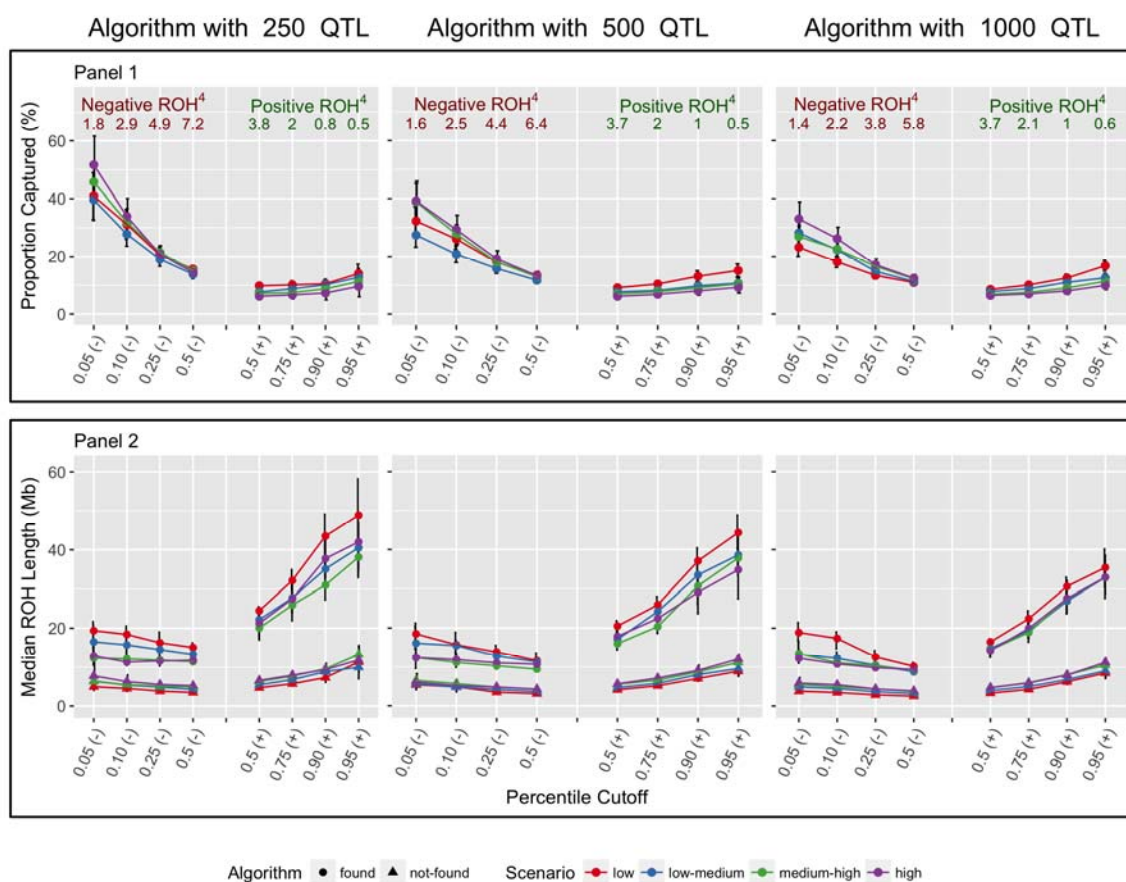

919

920 **Figure 3.** Summary (mean  $\pm$  CI)<sup>1</sup> of the correlation between individual inbreeding load  
 921 (IIL) and the true genetic signal (Panel 1)<sup>2</sup>, prediction accuracy for IIL and genotypic  
 922 estimates Bayesian ridge regression (Panel 2)<sup>3</sup> and significance of the regression  
 923 coefficient based on either a genome wide inbreeding metrics or IIL (Panel 3)<sup>4</sup> across  
 924 simulation scenarios<sup>5</sup>.

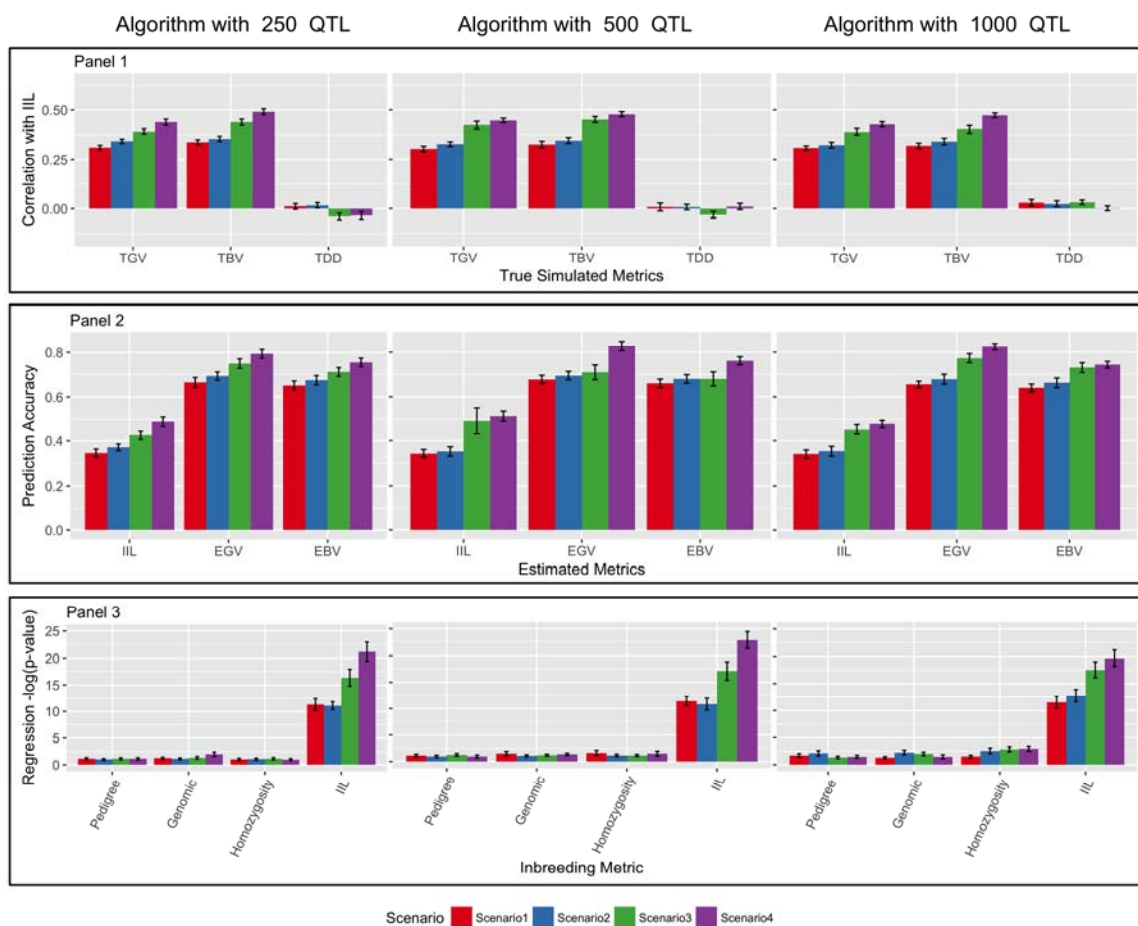

925
